1  
2  
3  
4  
5  
6  
7  
8  
9  
10  
11  
12  
13  
14  
15  
16  
17  
18  
19  
20  
21

Complex response in size-related traits of the bulb mites (*Rhizoglyphus robini*)  
in elevated thermal conditions – an experimental evolution approach.

Agata Plesnar-Bielak\*, Anna Jawor, Paulina Kramarz

*Institute of Environmental Sciences, Jagiellonian University, Gronostajowa 7, 30-387  
Kraków, Poland*

*\*corresponding author: [agata.plesnar@uj.edu.pl](mailto:agata.plesnar@uj.edu.pl)*

Short title:

Experimental evolution at altered temperature

Key words:

thermal plasticity, thermal evolution, experimental evolution, alternative reproductive  
phenotypes, egg size, development time

22

## 23 SUMMARY

24 Temperature is a key environmental factor affecting almost all aspects of life histories in  
25 ectotherms. The theory predicts that they grow faster, reach smaller sizes and produce smaller  
26 offspring when temperature increases. In addition, temperature changes, through their effects  
27 on metabolism, may also influence the expression of alternative reproductive phenotypes  
28 (ARP) in ectotherms. Although many studies investigated phenotypic plasticity of life history  
29 traits in relation to temperature change, little is known about how those traits and phenotypic  
30 plasticity may evolve together. In our study we subjected the bulb mites (non-model, soil  
31 organisms that normally experience rather stable thermal conditions) to experimental  
32 evolution in two temperature treatments: control (24° C) and elevated (28° C). After 18  
33 generations we measured adult body size, eggs size and development time of both treatments  
34 at control as well as at elevated temperature (test temperatures). Thus, we were able to detect  
35 genetic changes (the effect of selection temperature) and environmental effects (the effects of  
36 test temperature). We also observed the ARP expression throughout the experimental  
37 evolution. Our results revealed quite complex patterns of life history in traits response to  
38 temperature. Mites developed faster and reached smaller sizes at increased temperature, but  
39 evolutionary responses to increased temperature were not always parallel to the observed  
40 phenotypic plasticity. Additionally, despite smaller body sizes females laid larger eggs at  
41 higher temperature. This effect was more pronounced in animals evolving at elevated  
42 temperature. Evolution at increased temperature affected also ARP expression with the  
43 proportion of armored fighters decreasing from generation to generation. We propose that this  
44 could be the consequence of temperature sensitivity of cost to benefits ratio of the expressing  
45 ARPs.

46

47

48

## 49 INTRODUCTION

50 Ambient temperature, particularly in ectotherms is a key environmental factor affecting nearly  
51 every aspect of their life history (e.g. Blackenhorn, 2000) and shaping both evolutionary  
52 adaptation and phenotypic plasticity. A well-known example of a phenotypically plastic  
53 response to thermal conditions is the temperature size-rule (TSR; Atkinson, 1994): the  
54 increase of body size with decreasing temperature. Similarly, because the egg size is related to  
55 body size of a mother and optimal egg size depends on temperature (Perrin 1988), females at

56 lower temperature are expected to lay fewer but bigger eggs (Blanckenhorn, 2001). However,  
57 the TSR in arthropods is not universal as some species exhibit reverse or even more complex  
58 temperature-size patterns (e.g. David et al. 2006, Kammenga et al. 2007) and, more  
59 importantly, species geographical clines seem to contrast those of thermal plasticity observed  
60 in laboratory studies (e.g. *Drosophila* spp.; Angilletta, 2009).

61 Adult size is a product of growth rate and development duration (Davidovitz et al.  
62 2004) and, although body size and development time are strongly related to fitness, it is still  
63 debated what is the extent to which their responses to thermal conditions are mediated by  
64 phenotypic plasticity and evolutionary change. Experimental evolution approach is potentially  
65 a very powerful tool in solving this problem. However, only a few experimental evolution  
66 studies have explored adaptive response of body size (Partridge et al., 1994; Santos et al.,  
67 2006) or development time (Santos et al., 2006; Huey et al., 1991; James and Partridge, 1995)  
68 to selection at changed temperature. In addition, the majority of the studies were carried out  
69 on *Drosophila*, questioning the generality of observed patterns. Even less data are available  
70 on evolutionary changes in parental investments (egg or offspring size and number).  
71 However, it has been observed that changes in egg size with ambient temperature may occur  
72 within a single generation, indicating the effect of phenotypic plasticity (Blanckenhorn,  
73 2001). Despite a growing number of studies have investigating the selective benefits of the  
74 egg size at different temperatures (Blanckenhorn, 2000, Fischer et al., 2003, Bownds et al.,  
75 2010, Burgess and Marshall 2011), to our knowledge, only one experiment attempted to  
76 determine if egg size and phenotypic plasticity for this trait can evolve (Azevedo et al., 1996).

77 Furthermore, growth rate and development duration differ between the sexes  
78 triggering sexual size dimorphism (SSD). Larger body size increases female fecundity, male  
79 attractiveness and competitiveness, but when associated with prolonged development, it can  
80 expose an individual to external sources of mortality. Males also experience a conflict  
81 between selection for rapid development (protandry), often leading to smaller size, and  
82 selection for large body size. Interestingly, males and females have been shown to differ in  
83 their phenotypic plasticity for body size (Stillwell et al., 2010). Although females are often  
84 more plastic than males, the differences in plasticity may vary between environmental factors  
85 as well as the range of specific environmental variables (Stillwell and Fox, 2009). Therefore,  
86 sexes may handle temperature variation differently and the patterns of these differences might  
87 not be consistent, depending on a species, a population and temperature ranges (Stillwell et  
88 al., 2010).

89 Besides SSD, in some species sexes can differ in expression of discrete morphological  
90 variants - so called alternative reproductive phenotypes (ARP), often differing in both growth  
91 rate and development time and thus in adult body size. These forms of adaptive phenotypic  
92 variants, usually males, are manifested as morphological differentiation in structures used in  
93 male-male competition, such as horns in scarab beetles (Emlen 1994, Kotiaho et al. 2003) or  
94 male leg dimorphism in acarid mites (Woodring, 1969; Radwan, 1995, 2001). The problem of  
95 shifts in proportion of ARP under different thermal conditions is very poorly studied, despite  
96 the fact that it may be of great importance as such shifts may influence the strength of sexual  
97 selection acting in a population at different temperatures as ARP differ in their  
98 competitiveness. Our study mite species, *Rizoglyphus robini*, has two male morphs with  
99 different strategies of reproduction. Fighters, possessing a thickened third pair of legs that is  
100 used in fights with other males, are more aggressive and able to kill rivals and thus achieve  
101 higher reproductive success in mixed populations (Radwan and Klimas, 2001). Scramblers,  
102 with “normal” legs, are less aggressive and harmless to other males (Radwan, 2009). Morph  
103 expression in *R. robini* is genetically controlled (Radwan, 1995) but seems to be also  
104 condition dependent. It has been shown that fighters develop from larger trythonympy (last  
105 larval stage of the bulb mite) and that poor diet suppresses fighter expression (Smallegange,  
106 2011; Radwan, 1995). Hence, environmental conditions through their effects on body size  
107 and/or development time can change the proportion of morphs (Radwan, 1995; Smallegange,  
108 2011; Simpson et al., 2011). Furthermore, a study by Shepherd et al. (2008) implies that  
109 weapon structure can change body surface and thus may affect fighters’ thermoregulatory  
110 behavior and costs of weapon possession.

111 As a consequence of the above mechanisms, changes in thermal conditions may  
112 modify morph ratio in several ways. First, as fighters develop from larger trythonympy  
113 (Smallegange, 2011), increasing temperature may decrease the ratio of fighters by its effect on  
114 body size. What is more, fighting structures can change energy dissipation as a consequence  
115 of changes in body surface as suggested for horn-beetles (Shepherd et al., 2008), even though  
116 adult fighters have smaller abdomen than scramblers. Second, temperature is likely to affect  
117 cost of both production of thickened legs and performing aggressive strategy (e.g. Niecieza and  
118 Metcalfe, 1999). Due to its energetic costs, it is likely that the fighter strategy may become  
119 more costly at high temperature, so only males in particularly good condition would be able to  
120 benefit from it. In other words the switch point between the two morphs may be moved up by  
121 a temperature increase.

122

123 In the current study we applied an experimental evolution approach where populations  
124 of bulb mites *Rhizoglyphus robini* were allowed to evolve in two thermal treatments. After 18  
125 generations the size-related life history traits were measured at both experimental  
126 temperatures (elevated and control), which enabled us to distinguish between genetic changes  
127 (the effect of selection temperature) and environmental effects (the effect of test temperature).  
128 The proportion of fighters was measured throughout 35 generations of the experimental  
129 evolution. Thus, the objective of the study was threefold. First, we compared thermal  
130 phenotypic plasticity and evolutionary changes in eggs size, development rate and size at  
131 maturity. Second, we compared thermal reaction norms for females and males to estimate sex-  
132 specific response to temperature. Third, we assessed how expression of ARP had changed  
133 during evolution in elevated temperature conditions.

134

## 135 **MATERIALS AND METHODS**

136

### 137 *General procedures*

138 Base populations and large mite groups were maintained in plastic containers (2 cm high, 2.5  
139 cm in diameter), whereas individuals and small groups of mites were kept in 0.8 cm diameter  
140 glass tubes (2 cm high) with plaster of Paris bases soaked with water. Mites were maintained  
141 under humidity of >90% and fed powdered yeast *ad libitum*.

142

### 143 *Base population*

144 The mites used in the experiment originated from a stock culture combined of two  
145 populations derived from colonies of ca. 200 individuals found on onions in a garden near  
146 Kraków, Poland in 1998 and 2008. Since then, each population had been maintained in the lab  
147 at large numbers (>1000 individuals). The two populations had been mixed about ten  
148 generations prior to the beginning of the experimental evolution so as to increase genetic  
149 variation, which is crucial in the limited time span of laboratory experiments on multicellular  
150 organisms where adaptations arise from standing genetic variation rather than *de novo*  
151 mutations (see Barret and Schuler, 2007 for review).

152

### 153 *Experimental lines*

154 To test the impact of increased temperature on the evolution of life history traits in the bulb  
155 mite, we established five lines which were maintained at 28° C (high temperature; HT lines)

156 and five lines that were kept at 24° C, the temperature to which our base population had been  
157 adapted to (control temperature; C lines).

158 Each generation, 20 virgin males and 20 virgin females were placed into one container  
159 and left to interact freely for 5 days. After this time, all females within each line were  
160 transferred to a common container to lay eggs. Densities of developing larvae and ovipositing  
161 females were low in all the lines thanks to the size of containers. When tritonymphs (the last  
162 larval stage in bulb mites) emerged, ca. 80 - 90 of them were isolated to individual glass  
163 tubes. Emerging adults were then sexed and each male morph was noted. Twenty individuals  
164 of each sex from each line were used to start a new generation.

165

### 166 *Experimental procedures*

167 After 18 generations of experimental evolution the following life history traits were  
168 measured: eggs size, adult body size and development time. We established a full two by two  
169 factorial experimental design so that each line was tested at both temperatures. As female  
170 fecundity (the number of eggs) was measured four generations earlier and reported in a  
171 previous study (Plesnar-Bielak et al., 2012) we decided not to replicate these measurements.  
172 Instead, in the current study we discuss changes in egg and body size in the context of  
173 fecundity results obtained earlier.

174 Life history traits were measured in the next generation after transferring mites to  
175 experimental thermal environment to avoid maternal effects caused by developing, mating  
176 and ovipositing of females at the selection temperatures. Twenty previously mated females  
177 from each line were placed together for two days to lay eggs. After this time half of the eggs  
178 were put at 24° C and the other half at 28° C to develop. When the eggs developed to the  
179 tritonymph stage they were isolated to individual tubes. After reaching adulthood ca. 40  
180 individuals per line per test temperature treatment were put into a common mating vial for  
181 five days. Then, mated females were transferred to individual tubes and left to lay eggs. Two  
182 eggs laid by each female were taken for egg size measurements and some of the others were  
183 left to develop and were later isolated to individual tubes (at the tritonymph stage) and left to  
184 mature. Emerged adults were used later to measure adult body size and in the development  
185 time assay.

186

#### 187 *a) Egg size measures*

188 Two eggs laid by each female (total of ca. 500 eggs) were photographed using a  
189 stereomicroscope (30 times enlargement). The length and width of each egg were measured

190 using ImageJ software and the mean values for the female were taken to calculate egg volume  
191 as  $1/(6\pi w^2 l)$  (Smallegange, 2011), where  $w$  is egg width and  $l$  is egg length. Egg size was  
192 analyzed using General Linear Model in Statistica 10 with log-transformed mean egg volume  
193 for a female as a response variable, selection temperature and test temperature as fixed factors  
194 and line ID nested in selection temperature as random factor.

195

196 *b) Adult body size measures*

197 Two male and two female offspring of each female (see *Experimental procedures*) were  
198 photographed using the stereomicroscope and their body length (with absence of mouthparts)  
199 was measured using the ImageJ software. In the case of males, only scramblers were  
200 measured because of very low frequencies or even no fighters in some of the treatments (see  
201 Results: changes of fighter proportion). Due to technical reasons (small number of individuals  
202 available) males from two lines were not included in the analyses, male and female body sizes  
203 were analyzed separately as there were different numbers of male and female lines in the  
204 analysis. The General Linear Model was applied with mean body length as a response  
205 variable, selection temperature and test temperature as fixed factors and line ID nested in  
206 selection temperature as random factor.

207

208 *c) Development time measures*

209 Fifteen males and fifteen females per each line per test temperature (not more than one from  
210 each female) were placed together into one container. After two days during which multiple  
211 mating took place, females were transferred to fresh containers in which they were allowed to  
212 lay eggs. Twenty-four hours after the first eggs were laid, the females were discarded. The  
213 containers were checked daily for emerging adults. Number of adults and their sex were  
214 verified and noted each day. Data were analyzed using a General Linear Model with sex,  
215 selection temperature and test temperature as fixed factors and line ID nested in selection  
216 temperature as random factor.

217

218 *Changes of fighter proportion*

219 Numbers of fighters and scramblers were noted each generation while sexing individuals. The  
220 proportion of fighters to total number of males was recorded throughout 35 generations of  
221 selection. We performed a repeated measure ANOVA on square root transformed fighter  
222 proportions with selection temperature as a predictor and generation as the repeated factor. In  
223 this analysis we included the data collected in generations 5, 10, 15, 20, 25, 30 and 35.

224

## 225 **RESULTS**

226

### 227 *Egg size measures*

228 Egg size was affected by test temperature with larger eggs laid at increased temperature  
229 (Tab.1, Fig. 1). Although the effect of selection temperature was non-significant, its  
230 interaction with test temperature significantly influenced egg size (Tab.1). At both  
231 temperatures HT females laid smaller eggs than C females, with eggs smaller at 24° C than at  
232 28° C (the temperature at which they have evolved; Fig. 1). There was also a significant effect  
233 of line ID (Tab. 1).

234

### 235 *Adult body size measures*

236 Body size of both sexes was affected by test temperature (Tab. 1, Fig. 2). Note also that the  
237 decrease in body size with temperature was greater for females (19% decrease) than for males  
238 (7%). Neither selection temperature nor its interaction with test temperature had a significant  
239 effect on body size. There were significant differences in body size of both sexes between the  
240 lines (Tab. 1).

241

### 242 *Development time measures*

243 Males developed significantly slower than females (Tab.2, Fig.3). Both test temperature and  
244 selection temperature as well as their interaction affected development time. Development  
245 was faster at increased temperature, but HT lines developed slower than C lines, especially at  
246 control temperature. The effect of line ID was also significant (Tab. 2). No interaction with  
247 sex was significant (Tab. 2). Removing those interactions from the model did not influence  
248 the results quantitatively.

249

### 250 *Changes of fighter proportion*

251 The proportion of fighters decreased from generation to generation in HT lines (Fig. 4).  
252 Repeated measure ANOVA revealed significant effect of selection temperature, generation  
253 and, most importantly, their interaction on the proportion of fighters (Tab. 3).

254

## 255 **DISCUSSION**

256



257 We demonstrated differences between evolutionary and plastic responses (the effects of  
258 selection vs. test temperature) of the studied traits to ambient temperature increase. One of the  
259 most striking of our outcomes is the response of egg size to temperature change – eggs laid by  
260 HT females were smaller than those laid by C females at both test temperatures. In a previous  
261 study (Plesnar-Bielak et al., 2012), it has been shown that both C and HT females laid fewer  
262 eggs at increased temperature. Hence, the difference in egg size between HT and C lines can  
263 be explained by a trade off between egg number and egg size. This kind of compensation is  
264 also supported by the steeper increase of egg size with test temperature in HT lines. Together  
265 with HT lines having a fecundity advantage over control lines at the increased temperature  
266 (Plesnar-Bielak et al., 2012), our results indicate higher lifetime fitness of HT populations and  
267 thus their adaptation to elevated thermal conditions.

268 A trade off between the size of eggs and their number is quite common in populations  
269 exposed to changing thermal conditions. Similarly to our outcomes, a study by Seko et al.  
270 (2006) has showed that butterfly, *Parnara guttata guttata*, laid fewer but bigger eggs at higher  
271 temperature. Furthermore, the authors have also found, that both females and males were  
272 smaller at increased temperature. An opposite pattern (more smaller eggs in elevated thermal  
273 conditions) has been shown in amphipod *Gammarus lacustris* (Wilhelm and Schindler, 2000)  
274 as well as in tropical butterfly, *Bicyclus anynana*, (Geister et al, 2008), however females  
275 investment in progeny was higher at elevated (more beneficial) thermal conditions (Geister et  
276 al, 2008).

277 We did not observe the evolution of neither adult body size nor phenotypic plasticity  
278 of this trait. The relationship between temperature and body size of both males and females  
279 was straightforward and followed the TSR (Atkinson, 1994) as mites reached smaller sizes at  
280 increased temperature, irrespective of their selection regime. This outcome seems to  
281 correspond to development time as all of the lines developed faster when kept at higher  
282 temperature (as, in accordance with TSR, temperature negatively affects development and  
283 leads to smaller body size). According to Karl and Fischer (2008), energy assimilation and its  
284 conversion to biomass may increase with temperature, which is followed by faster growth.  
285 However, irrespective of thermal conditions, C lines developed faster than HT lines, again  
286 supporting the possible evolution of HT populations. An open question remains, why the  
287 direction of an evolutionary response in our populations to development time was opposite to  
288 the direction of phenotypic plasticity. If longer development of HT lines was a side-effect of  
289 selective pressure to increase body size, one would expect selection temperature to  
290 significantly affect size, which was not the case. Probably, their prolonged development may

291 have been associated with investment into some physiological traits increasing their  
292 performance under thermally stressful conditions (Plesnar-Bielak 2012), which might have  
293 led to the fecundity advantage demonstrated before (Plesnar-Bielak et al., 2012), perhaps  
294 through higher maternal investment as observed in *B. anynana* (Geister et al, 2008).

295 In our study, we observed that irrespective of temperate and despite being smaller,  
296 males took longer to develop relative to females, which would suggest slower growth rate of  
297 males than females. Our results seem to contradict the widely accepted hypothesis explaining  
298 SSD - natural selection should favor either protandry (then males should be smaller and  
299 develop faster) or synchronized emergence of both sexes (then males should be the size of  
300 females). At the same time, although production of sperm is cheaper than eggs production  
301 (Darwin, 1871; Andersson, 1994; Simmons, 2001, Blanckenhorn et al. 2007), the production  
302 of gonads may be more costly for males than for females (Reed and Beckage 1997, Dixon  
303 2000), which would elongate male development time. In addition, selection pressure for  
304 increased body size should be stronger for females than for males (Andersson, 1994,  
305 Blanckenhorn et al. 2007), because female fitness depends presumably on fecundity which in  
306 turn depends on size (Honek, 1993, Blanckenhorn et al. 2007). This would explain the  
307 observed pattern of sex related differences in development time. Furthermore, larger  
308 individuals may suffer greater heat stress (Blanckenhorn, 2000) because an excess of heat  
309 (originating either from metabolic processes or from environment) in elevated temperature is  
310 harder to dissipate (Shepherd et al., 2008). Smaller individuals also need less energy for  
311 maintenance, thus they have more energy for any other activities including searching for  
312 partners and food, mating and investment in their sperm supply (Blanckenhorn 2000).

313 At the same time, one should keep in mind that for males we examined only  
314 scramblers because fighter morphs almost disappeared in HT lines during the course of the  
315 experiment – what is in fact, one of the most interesting results of our study. The proportion  
316 of alternative phenotypic forms can be induced by changes in environmental conditions  
317 affecting developmental trajectories (see Fusco and Minelli, 2010 for review). Indeed, thermal  
318 environment affected morph expression in our lines – at increased temperature the proportion  
319 of fighters decreased in subsequent generations, whereas it did not change in control lines. As  
320 fighters have been shown to develop from larger trytholimphs (Smallegange, 2011), the  
321 decrease in the proportion of fighters may be simply an effect of the decrease in body size  
322 with temperature. However, if that would be the case, the decrease in fighter proportion  
323 should be instantaneous, because body size was affected only by the temperature during  
324 development (test temperature) and did not evolve during experimental evolution. Another

325 possible explanation is that increased temperature changed the costs-to-benefits ratio of  
326 inducing fighter and scrambler morphs or changed the relationship of this ratio with body size  
327 and condition. If fighter strategy had become more costly, it might have been beneficial only  
328 to males in very high condition. In fact, the costs of expressing fighter strategy are likely to be  
329 affected by temperature as aggressive behavior and long fights consume lots of energy  
330 (Nicieza and Metcalfe, 1999) and the energetic costs of behavioral and physiological traits  
331 increase with temperature (Elliot et al., 2005). Indeed, among genes with sex-biased  
332 expression, there are more genes expressed only in fighters than in scramblers and,  
333 importantly, many of them are metabolically related (Stuglik et al., unpublished). The  
334 increase in costs of fighter expression may have moved the switch point between the two  
335 morphs (the size at which a trythonymph is equally likely to develop into either of the two  
336 morphs) towards a bigger size. Estimating the switch point between the morphs in populations  
337 evolving at different temperatures as well as measuring relative costs and benefits of  
338 expressing both morphs at different temperatures would be needed to further verify this  
339 hypothesis.

340 Overall, our study shows that reaction norms for body size and development time are  
341 in line with the TSR predictions as mites develop faster and reach smaller sizes at increased  
342 temperature. At the same time, we have found that genetic effects of thermal adaptation were  
343 not always parallel to the reaction norms. Together with differences between males and  
344 females in their phenotypic plasticity in body size, life history traits revealed quite complex  
345 patterns of response to the changes in temperatures. We have also demonstrated that evolution  
346 at increased temperature affects the expression of alternative reproductive phenotypes in the  
347 bulb mites. Although we propose an explanation of the evolutionary mechanism behind this  
348 effect (which is the change of cost/benefits ratio of expressing a given morph with  
349 temperature), testing it would certainly need further investigations.

350 Two outcomes of our study are rather puzzling. First - despite smaller body sizes, the  
351 bulb mite females laid larger eggs at a higher temperature, and the pattern was more striking  
352 for lines evolving in elevated thermal conditions (HT lines). Second – males took longer to  
353 develop than females which is in contrast with the commonly accepted hypothesis that natural  
354 selection favors either protandry or synchronized emergence of both sexes. Further  
355 investigation into egg dry mass and their associated nutritional values, embryonic and larval  
356 viability as well as fitness of different male morphs at different test and selection temperatures  
357 could help solve these questions.

358 Our study may also help answer the question of adaptability of populations in the face  
359 of climate change. Together with temperature rise observed during the last few decades,  
360 climate warming has already caused shifts in latitudinal ranges and in phenology of many  
361 species (see Kingsolver, 2009 for review). At the same time, experimental evolution studies  
362 have showed that at least in case of microbes populations are able to adapt to novel thermal  
363 conditions but fitness improvement depends on temperature range (see Hoffmann and Sgrò  
364 2011 for discussion). The bulb mites inhabit rather stable thermal environment as they live in  
365 soil (Diaz et al. 2000) and we may predict that *R. robini* would be highly thermosensitive  
366 (Angilletta 2009, Kingsolver 2009). We exposed our populations to quite substantial  
367 temperature increase (4°C), but it remained within their adaptive capacities as indicated by the  
368 evolution of trade-offs between development time and number and size of eggs. We showed  
369 that populations can respond to temperature increase by both phenotypic plasticity and  
370 complex evolutionary changes depending on a trait under consideration. What is more, we  
371 found that adaptation may occur rapidly, allowing populations to survive sudden  
372 environmental changes. Interestingly, elevated thermal conditions have also influenced male  
373 alternative reproductive phenotypes implying that climate warming may affect male  
374 competitiveness and sexual selection and these have been show to influence the adaptive  
375 potential of populations (Plesnar-Bielak et al., 2012).

376

#### 377 ACKNOWLEDGEMENTS

378 We thank Jacek Radwan (Adam Mickiewicz University in Poznań, Jagiellonian University, ),  
379 Eoin Duffy (Jagiellonian University), Marcin Czarnołęcki (Jagiellonian University),  
380 Aleksandra Walczyńska (Jagiellonian University) and two anonymous reviewers for their  
381 comments on earlier versions of the manuscript.

382

#### 383 FUNDING

384 The project was supported by grant no. N303 529438 from the Polish Ministry of Science and  
385 Higher Education and Jagiellonian University (DS/WBINOZ/INOŚ/762/12).

386

#### 387 REFERENCES

- 388 **Andersson, M.B.** (1994). *Sexual Selection*. Princeton, NJ: Princeton University Press.  
389 **Angilletta, M. J. Jr.** (2009). *Thermal adaptation. A theoretical and empirical Synthesis*.  
390 Oxford University Press.

391 **Atkinson, D.** (1994). Temperature and organism size: a biological law for ectotherms. *Adv.*  
392 *Ecol. Res.* **25**, 1-58.

393 **Azevedo, R. B. R., French, V. and Partridge, L.** (1996). Thermal evolution of egg size in  
394 *Drosophila melanogaster*. *Evolution* **50**, 2338-2345.

395 **Barrett, R.D.H. and Schluter, D.** (2007). Adaptation from standing genetic variation. *Trends*  
396 *Ecol. Evol.* **23**, 38–44.

397 **Blackenhorn, W. U.** (2000). Temperature effects on egg size and their fitness consequences  
398 in the yellow dung fly *Scathophaga stercoraria*. *Evol. Ecol.* **14**, 627-643.

399 **Blanckenhorn, W. U.** (2001) Temperature effects on egg size and their fitness consequences  
400 in the yellow dung fly *Scathophaga stercoraria*. *Ecol. Evol.* **14**, 627-643.

401 **Blanckenhorn, W. U., Dixon, A. F. G., Fairbairn, D. J., Foellmer, M. W., Gibert, P., van**  
402 **der Linde, K., Meier, R., Nylin, S., Pitnick, S., Schoff, C., Signorelli, M., Teder, T.,**  
403 **Wiklund, C.** (2007) Proximate Causes of Rensch's Rule: Does Sexual Size Dimorphism in  
404 Arthropods Result from Sex Differences in Development Time? *Amer. Nat.* **169**, 245-257.

405 **Bownds, C., Wilson R., Marshall, D. J.** (2010) Why do colder mothers produce larger  
406 eggs? An optimality approach. *J. Exp Biol.* **213**, 3796-3801

407 **Burgess, S. C., Marshall, D. J.** (2011) Temperature-induced maternal effects and  
408 environmental predictability. *J. Exp Biol.* **214**, 2329-2336

409 **Elliot, S. L., Horton, C. M., Blanford, S., Thomas M. B.** (2005) Impacts of fever on locust  
410 life-history traits: costs or benefits? *Biol. Lett.* **1**, 181–184.

411 **Darwin, C.** (1871). *The Descent of Man and Selection in Relation to Sex*. London: John  
412 Murray.

413 **Davidowitz, G., D'Amico, L.J., Nijhout, H. F.,** (2004) The effects of environmental  
414 variation on a mechanism that controls insect body size. *Evol. Ecol. Res.* **6**, 49-62.

415 **David, J.R., Legout, H., Moreteau, B.** (2006) Phenotypic plasticity of body size in a  
416 temperate population of *Drosophila melanogaster*: When the temperature-size rule does not  
417 apply. *J. Gene.* **85**, 8-23.

418 **Dixon, A. F. G.** (2000). *Insect predator-prey dynamics: ladybird beetles and biological*  
419 *control*. Cambridge University Press, Cambridge.

420 **Emlen, D. J.** (1994). Environmental control of horn length dimorphism in the beetle  
421 *Onthophagus acuminatus* (*Coleoptera: Scarabaeidae*). *Proc. Roy Soc. Lond. B. Bio.* **56**, 131-  
422 136.

423 **Fischer, K., Brakefield P. M and Zwaan B. J.** (2003). Plasticity in butterfly egg size: why  
424 larger offspring at lower temperatures? *Ecology* **84**, 3138-3147.

425 **Fusco and Alessandro Minelli A.** (2010). Phenotypic plasticity in development and  
426 evolution: facts and concepts. *Proc. R. Soc. B*, **365**, 547-556

427 **Geister, T. L., Lorenz, M. W., Meyering-Vos, M., Hoffmann, K. H., Fischer, K.** (2008)  
428 Effects of temperature on reproductive output, egg provisioning, juvenile hormone and  
429 vitellogenin titres in the butterfly *Bicyclus anynana*. *J. Insect Physiol.* **54**, 1253–1260.

430 **Hoffmann, A. A. and Sgrò C. M.** (2011) Climate change and evolutionary adaptation.  
431 *Nature* **479**, 470-485.

432 **Honek, A.** (1993) Intraspecific variation in body size and fecundity in insects—a general  
433 relationship. *Oikos* **66**, 83-492.

434 **Huey, R.B.; Partridge, L; Fowler, K** (1991). Thermal sensitivity of *Drosophila*  
435 *melanogaster* responds rapidly to laboratory natural selection. *Evolution* **45**, 751-756.

436 **James, A. C. and Partridge, L.** (1995). Thermal evolution of rate of larval development in  
437 *Drosophila melanogaster* in laboratory and field populations. *J. Evol. Biol.* **8**, 315-330.

438 **Kammenga, J. E., Doroszuk A., Riksen, J. A. G., Hazendonk, E., Spiridon, L., Petrescu**  
439 **A-J., Tijsterman, M., Plasterk, R. H. A., Bakker, J.** (2007) A *Caenorhabditis elegans* Wild  
440 Type Defies the Temperature–Size Rule Owing to a Single Nucleotide Polymorphism in tra-3.  
441 *Plos Genetic* **3**, 0358-0366.

442 **Karl, I., Fischer, K.** (2008) Why get big in the cold? Towards a solution to a life-history  
443 puzzle. *Oecologia* **155**, 215–225.

444 **Kingsolver, J. G.** (2009) The well-temperated biologist. *Amer. Nat.* **174**, 000-000.

445 **Kotiaho, J.S., and Simmons, L.W.** (2003). Longevity cost of reproduction for males but no  
446 longevity cost of mating or courtship for females in the male-dimorphic dung beetle  
447 *Onthophagus binodis*. *J. Insect Physiol.* **49**, 817-822.

448 **Lailvaux S.P. and Kasumovic M.M.** (2011) Defining individual quality over lifetimes and  
449 selective contexts. *Proc. R. Soc. B* **278**, 321-328.

450 **Nicieza, A.G. and Metcalfe, N.B.** (1999) Costs of rapid growth: the risk of aggression is  
451 higher for fast-growing salmon. *Functional Ecol.* **13**, 793–800.

452 **Partridge, L., Barrie, B., Fowler, K., French, V.** (1994). Evolution and development of  
453 body size and cell size in *Drosophila melanogaster* in response to temperature. *Evolution* **48**,  
454 1269-1276.

455 **Perrin, N.** (1988). Why are offspring born larger when it is colder? Phenotypic plasticity for  
456 offspring size in cladoceran *Simocephalus vetulus* (Müller). *Func. Ecol.* **2**, 283-288.

- 457 **Plesnar-Bielak, A., Skrzynecka, A.M., Prokop, Z.M., Radwan, J.** (2012). Mating system  
458 affects population performance and extinction risk under environmental challenge. *Proc. Roy*  
459 *Soc. Lond. B. Bio.* **279**, 4661-4667.
- 460 **Radwan J.** (1995). Male morph determination in two species of acarid mites. *Heredity* **74**,  
461 669-673.
- 462 **Radwan, J.** (2001). Male morph determination in *Rhizoglyphus echinopus* (Acaridae). *Exp.*  
463 *App. Acarol.*, **25**, 143-149.
- 464 **Radwan, J.** (2009). Alternative mating tactics in acarid mites. *Adv. Stud. Behav.* **39**, 185-208.
- 465 **Radwan, J. and Klimas, M.** (2001). Male dimorphism in the bulb mite, *Rhizoglyphus robini*:  
466 fighters survive better. *Ethol. Ecol. Evol.* **13**, 69–79.
- 467 **Radwan, J., Czyz, M., Konior, M., Kolodziejczyk, M.** (2000) Aggressiveness in two male  
468 morphs of the bulb mite *Rhizoglyphus robini*. *Ethology* **106**, 53-62.
- 469 **Reed, D. A., and Beckage, N. E.** (1997). Inhibition of testicular growth and development in  
470 *Manduca sexta* larvae parasitized by the braconid wasp *Cotesia congregata*. *J. Insect Physiol.*  
471 **43**, 29– 38.
- 472 **Santos, M., Brites, D. and Laayouni, H.** (2006). Thermal evolution of pre-adult life history  
473 traits, geometric size and shape and developmental stability in *Drosophila melanogaster*. *J.*  
474 *Evol. Biol.* **20**, 2361-2370.
- 475 **Seko, T., Miyatake, T., Fujioka, S., Nakasuji, F.** (2006) Genetic and environmental sources  
476 of egg size, fecundity and body size in the migrant skipper, *Parnara guttata guttata*  
477 (Lepidoptera: Hesperidae). *Popul. Ecol.* **48**, 225–232.
- 478 **Simmons, L. W.** (2001). *Sperm competition and its evolutionary consequences in the insects*.  
479 Princeton University Press, Princeton, NJ.
- 480 **Smallegange, I. M.** (2011). Effects of paternal phenotype and environmental variability on  
481 age and size at maturity in a male dimorphic mite. *Naturwissenschaften* **98**, 339-346.
- 482 **Stillwell R.C. and Fox Ch. W.** (2009) Geographic variation in body size, sexual size  
483 dimorphism and fitness components of a seed beetle: local adaptation versus phenotypic  
484 plasticity *Oikos*, **118**, 703- 712.
- 485 **Stillwell, R., Wolf, C., Blanckenhorn, U., Teder, T., Davidowitz, G. and Fox C. W.** (2010)  
486 Sex Differences in Phenotypic Plasticity Affect Variation in Sexual Size Dimorphism in  
487 Insects: From Physiology to Evolution *Annu. Rev. Entomol.* **55**, 227–45
- 488 **Shepherd, B. L., Prange, H. D., Moczek, A. P.** (2008) Some like it hot: body and weapon  
489 size affect thermoregulation in horned beetles. *J. Insect. Physiol.* **54**, 604–611.

490 **Wilhelm, F.M., Schindler, D.W.** (2000) Reproductive strategies of *Gammarus lacustris*  
491 (Crustacea: Amphipoda) along an elevation gradient. *Funct. Ecol.* **14**, 413-422.

492 **Woodring, J. P.** (1969) Observations on the biology of six species of acarid mites. *Ann.*  
493 *Entomol. Soc. Am.* **62**, 102-108.

494

495 AUTHOR CONTRIBUTION:

496 A. P-B developed the concept, A. P-B and A.J performed experiments and data analysis, A. P-  
497 B and P.K. prepared and edited the manuscript prior to submission. The authors declare no  
498 competing interests.

499

500 TABLES:

501

502 Table 1. Effects of selection temperature (selection) and test temperature (test) on egg size  
503 and female and male body size analyzed using a nested ANOVA (selection temperature and  
504 test temperature are fixed factors, line ID is a random factor in selection temperature).

505

|                        | Egg size |        |        | Female body size |        |        | Male body size |        |        |
|------------------------|----------|--------|--------|------------------|--------|--------|----------------|--------|--------|
|                        | df       | F      | p      | df               | F      | p      | df             | F      | p      |
| selection              | 1, 8     | 2.070  | 0.188  | 1, 8             | 0.047  | 0.833  | 1, 6           | 0.086  | 0.779  |
| test                   | 1, 267   | 43.802 | <0.001 | 1, 178           | 76.273 | <0.001 | 1, 98          | 18.924 | <0.001 |
| selection<br>x test    | 1, 267   | 8.022  | 0.005  | 1, 178           | 0.233  | 0.630  | 1, 98          | 0.574  | 0.451  |
| line ID<br>(selection) | 8, 267   | 50.518 | <0.001 | 8, 178           | 6.476  | <0.001 | 6, 98          | 2.995  | 0.010  |
| error                  | 267      | -      | -      | 178              | -      | -      | 98             | -      | -      |

506

507



508

509 Table 2. Effects of selection temperature (selection) and test temperature (test) and sex on  
510 development time analyzed using a nested ANOVA (selection temperature, test temperature  
511 and sex are fixed factors, line ID is a random factor in selection temperature).

512

|                        | Development time |         |        |
|------------------------|------------------|---------|--------|
|                        | df               | F       | p      |
| selection              | 1, 8             | 9.672   | 0.014  |
| test                   | 1, 2939          | 377.605 | <0.001 |
| sex                    | 1, 2939          | 11.598  | <0.001 |
| selection x test       | 1, 2939          | 11.88   | <0.001 |
| selection x sex        | 1, 2939          | 0.985   | 0.321  |
| test x sex             | 1, 2939          | 0.506   | 0.477  |
| selection x test x sex | 1, 2939          | 1.576   | 0.209  |
| line ID (selection)    | 8, 2939          | 22.616  | <0.001 |
| error                  | 2939             | -       | -      |

513

514

515 Table 3. Effects of generation number and selection temperature (selection) on the proportion  
516 of fighters analyzed with repeated measure ANOVA.

517

| effect                 | df    | F      | p      |
|------------------------|-------|--------|--------|
| selection              | 1, 7  | 23.766 | 0.002  |
| generation             | 6, 42 | 6.553  | <0.001 |
| selection x generation | 6, 42 | 4.750  | <0.001 |

518

519 FIGURE LEGENDS:

520

521 Figure 1. **Mean (transformed to  $\ln$ ) volume of eggs at 24°C and 28°C in HT (black**  
522 **squares) and C (white circles) lines.** Bars donate 95% confidence intervals.

523

524 Figure 2. **Mean body size of females (A) and males (B) at 24°C and 28°C in HT (black**  
525 **squares) and C (white circles) lines.** Bars donate 95% confidence intervals.

526

527 Figure 3. **Mean development time of females (A) and males (B) at 24°C and 28°C in HT**  
528 **(black squares) C (white circles) lines.** Bars donate 95% confidence intervals.

529

530 Figure 4. **Proportion on fighters measured in generation 5, 10, 15, 20, 25, 30 and 35 in**  
531 **HT (black squares) and C (white circles) lines.** Bars donate 95% confidence intervals for  
532 means.

533

534

535

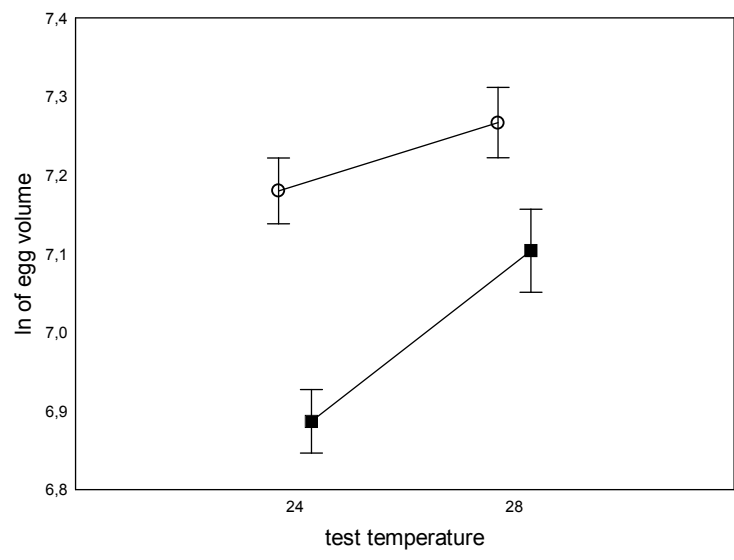

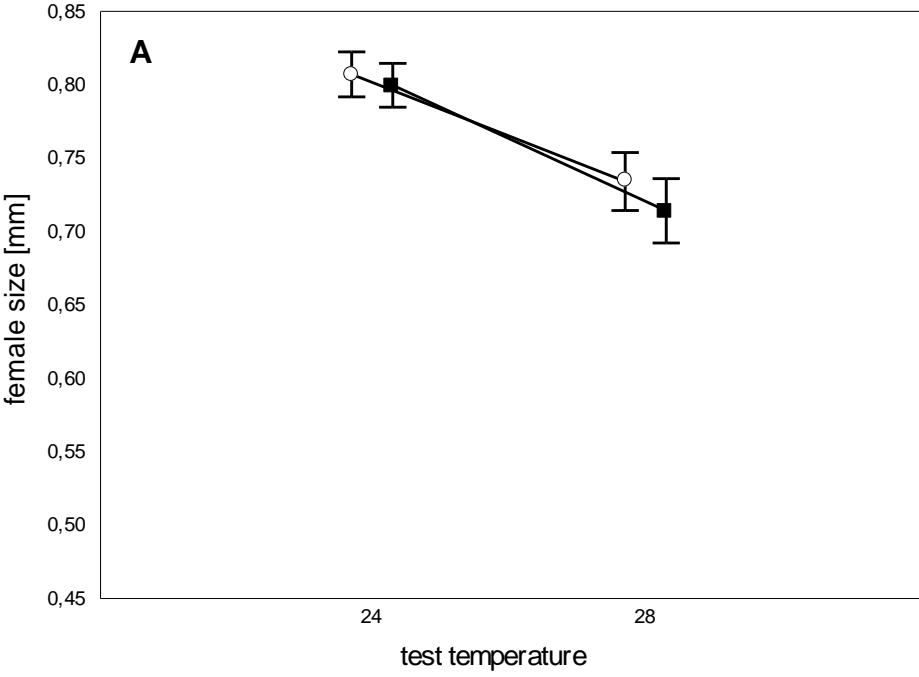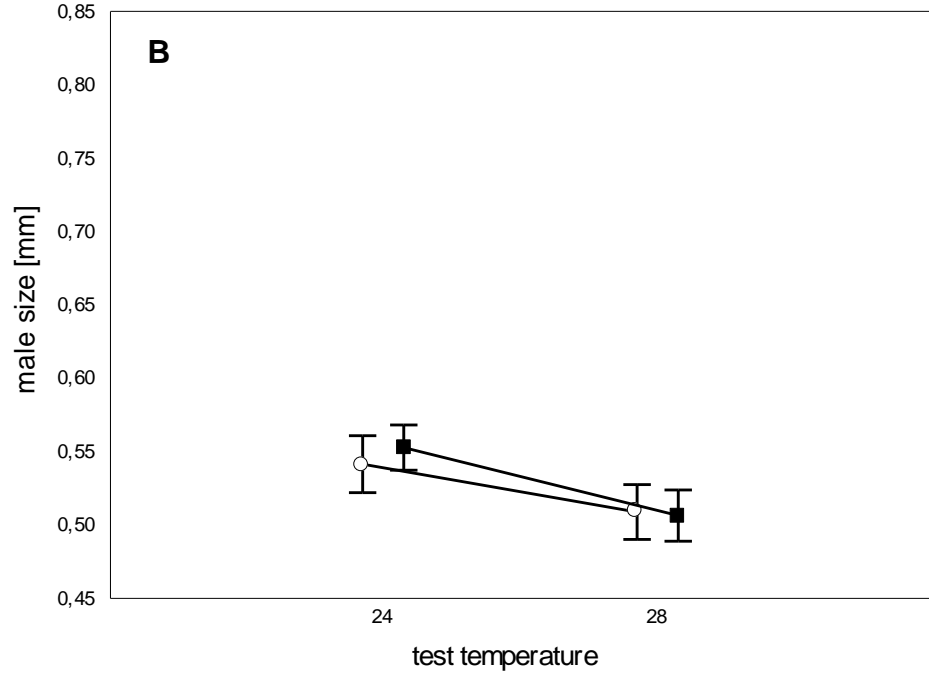

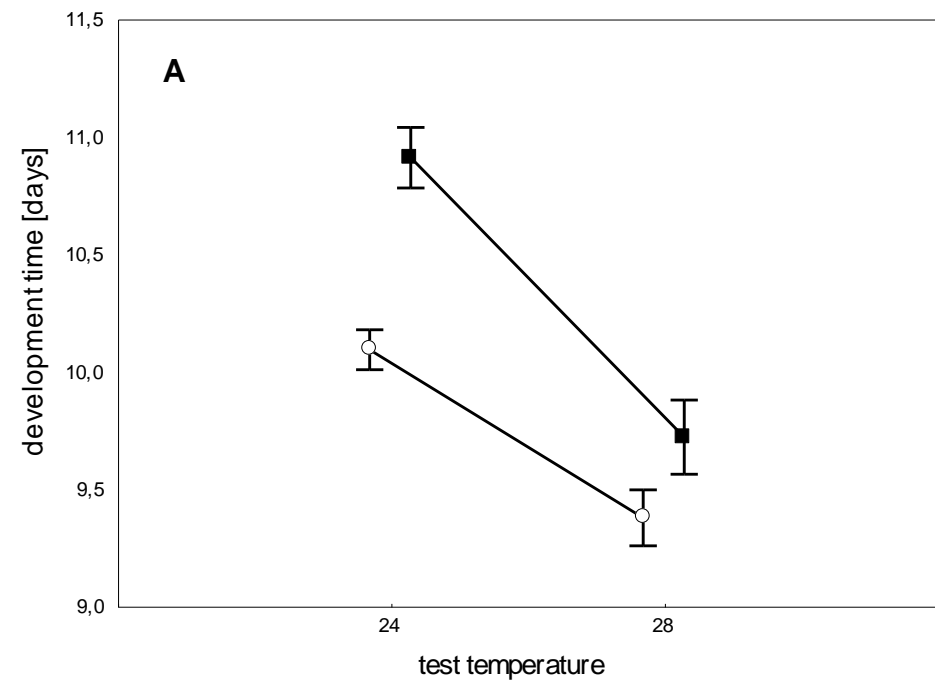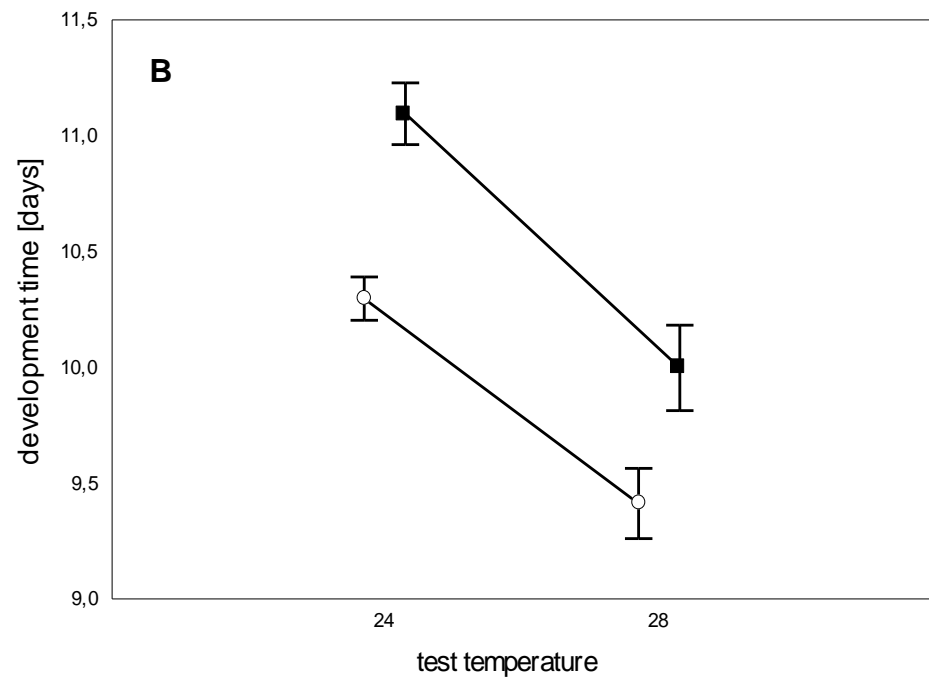

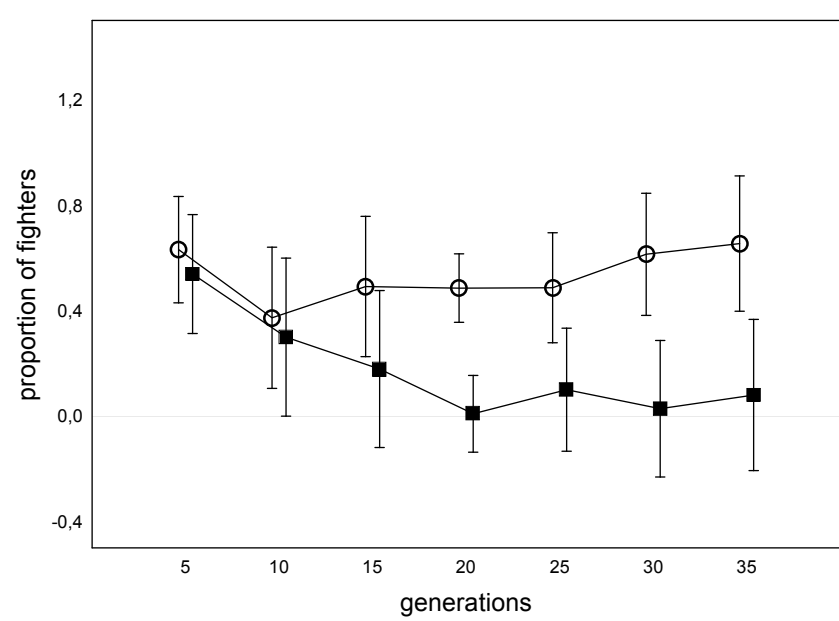

Source: https://cob.silverchair.com/jeb/article-pdf/doi/10.1242/jeb.090951/2037519/jeb_090951.pdf
